# Supplementary material for: Neutral NiII, PdII and PtII ONS-pincer complexes of 5-acetylbarbituric-4N-dimethylthiosemicarbazone: synthesis, characterization and properties
Source: Royal Society of Chemistry journal article supplement (doi:10.1039/c2dt31753b), 2012-01-01
Supplement: c2dt31753b.pdf [file c2dt31753b.pdf]

**Neutral Ni(II), Pd(II) and Pt(II) ONS-pincer complexes of 5-acetylbarbituric-4N-dimethylthiosemicarbazone. Synthesis, characterization and properties.**

**Alfonso Castiñeiras, Nuria Fernández-Hermida, Isabel García-Santos<sup>1</sup>, Lourdes Gómez-Rodríguez**

*Universidad de Santiago de Compostela, Departamento de Química Inorgánica,  
Facultad de Farmacia, Santiago de Compostela, 15782, Spain*

***Supplementary Information***

---

<sup>1</sup> Author to whom correspondence should be addressed. Fax: +34 881 815 090. E-mail: [isabel.garcia@usc.es](mailto:isabel.garcia@usc.es)

† Electronic supplementary information (ESI) available: CCDC reference numbers 871179 (**1a**), 871180 (**2a**), and 871181 (**3a**). For ESI and crystallographic data in CIF or other electronic format see DOI: xxxxxxxxxxxxxxxx

**Table SM1.** Selected bond distances (Å) and angles (°) for the thiosemicarbazone in [Ni(HAc4DM)<sub>2</sub>] $\cdot$ 2H<sub>2</sub>O, **1a**, [Pd(Acb4DM)(DMSO)] $\cdot$ DMSO, **2a**, and [Pt(Acb4DM)(DMSO)] $\cdot$ DMSO, **3a**.

| Compound          | <b>1a</b> <sup>a</sup> | <b>2a</b> | <b>3a</b> |          |
|-------------------|------------------------|-----------|-----------|----------|
| <i>Distances</i>  |                        |           |           |          |
| S(1)–C(18)        | 1.704(3)               | 1.699(3)  | 1.769(5)  | 1.758(7) |
| C(17)–N(12)       | 1.289(3)               | 1.290(3)  | 1.294(5)  | 1.292(7) |
| N(12)–N(13)       | 1.397(3)               | 1.404(3)  | 1.410(5)  | 1.436(7) |
| N(13)–C(18)       | 1.357(4)               | 1.362(3)  | 1.287(6)  | 1.297(8) |
| C(18)–N(14)       | 1.326(4)               | 1.331(3)  | 1.350(6)  | 1.358(8) |
| C(16)–C(17)       | 1.461(4)               | 1.468(3)  | 1.458(6)  | 1.448(8) |
| C(11)–C(16)       | 1.413(4)               | 1.413(3)  | 1.410(6)  | 1.409(8) |
| C(11)–O(11)       | 1.252(3)               | 1.254(3)  | 1.276(5)  | 1.281(7) |
| C(13)–O(13)       | 1.233(4)               | 1.234(3)  | 1.222(5)  | 1.221(7) |
| C(15)–O(15)       | 1.231(4)               | 1.254(3)  | 1.232(5)  | 1.232(7) |
| <i>Angles</i>     |                        |           |           |          |
| O(11)–C(11)–N(11) | 115.3(2)               | 115.7(2)  | 112.1(4)  | 112.2(5) |
| O(11)–C(11)–C(16) | 127.3(2)               | 126.7(2)  | 128.2(4)  | 127.1(5) |
| N(11)–C(11)–C(16) | 117.4(2)               | 117.6(2)  | 119.7(4)  | 120.8(5) |
| C(11)–C(16)–C(17) | 120.7(2)               | 120.7(2)  | 123.2(4)  | 124.9(5) |
| C(16)–C(17)–N(12) | 118.4(2)               | 118.4(2)  | 123.3(4)  | 121.5(5) |
| C(17)–N(12)–N(13) | 116.6(2)               | 116.7(2)  | 115.1(3)  | 113.6(5) |
| N(12)–N(13)–C(18) | 118.6(2)               | 117.2(2)  | 116.5(4)  | 115.9(5) |
| N(13)–C(18)–N(14) | 116.1(3)               | 116.0(2)  | 118.5(5)  | 117.7(6) |
| N(13)–C(18)–S(1)  | 120.7(2)               | 121.6(2)  | 123.5(4)  | 124.0(5) |
| N(14)–C(18)–S(1)  | 123.2(2)               | 122.4(2)  | 117.9(4)  | 118.3(5) |

<sup>a</sup>) The two columns correspond to the values of molecules of ligand 1 and 2.
